# Supplementary material for: Short- and Long-term Effects of a Mobile Phone App in Conjunction With Brief In-Person Counseling on Physical Activity Among Physically Inactive Women: The mPED Randomized Clinical Trial
Source: PubMed Central journal article supplement (PMC6632135; doi:10.1001/jamanetworkopen.2019.4281), 2019-05-24
Supplement: jamanetwopen-2-e194281-s002.pdf [file jamanetwopen-2-e194281-s002.pdf]

## Supplementary Online Content

Fukuoka Y, Haskell W, Lin F, Vittinghoff E. Short- and long-term effects of a mobile phone app in conjunction with brief in-person counseling on physical activity among physically inactive women: the mPED randomized clinical trial. *JAMA Netw Open*. 2019;2(5):e194281. doi:10.1001/jamanetworkopen.2019.4281

**eTable 1.** Subgroup Analyses of Age and Body Mass Index (BMI) in Daily Total Steps and Moderate to Vigorous Physical Activity (MVPA)

**eTable 2.** Other Self-Reported Measures

**eTable 3.** Safety Data Summary

This supplementary material has been provided by the authors to give readers additional information about their work.

**eTable 1. Subgroup analyses of age and body mass index (BMI) in daily total steps and moderate to vigorous physical activity (MVPA)**

|                            | 3 months                 |                     |                        |                     | 9 months                 |                     |                        |                     |
|----------------------------|--------------------------|---------------------|------------------------|---------------------|--------------------------|---------------------|------------------------|---------------------|
|                            | Total steps per day      | Interaction P value | MVPA (minutes) per day | Interaction P value | Total steps per day      | Interaction P value | MVPA (minutes) per day | Interaction P value |
| Subgroup                   | Mean (95% CI)            |                     | Mean (95% CI)          |                     | Mean (95% CI)            |                     | Mean (95% CI)          |                     |
| Age ≥ 55 years old         | 2033.5 (933.5 to 3073.6) | .98                 | 18.2 (8.4 to 28.0)     | .96                 | 1449.9 (538.0 to 2361.8) | .78                 | 11.4 (2.6 to 20.1)     | .36                 |
| Age < 55 years old         | 2055.8 (945.2 to 3166.5) |                     | 17.8 (7.3 to 28.3)     |                     | 1256.5 (281.8 to 2231.2) |                     | 5.3 (-4.0 to 14.7)     |                     |
| BMI ≥30 kg/m <sup>2</sup>  | 2140.5 (1053 to 3227.9)  | .89                 | 19.4 (9.1 to 29.7)     | .79                 | 1040.5 (95.1 to 1985.8)  | .38                 | 8.6 (-0.5 to 17.8)     | .92                 |
| BMI < 30 kg/m <sup>2</sup> | 2029.0 (962.4 to 3095.6) |                     | 17.3 (7.2 to 27.4)     |                     | 1638.9 (707.9 to 2569.8) |                     | 8.0 (-1.1 to 17.0)     |                     |

| <b>eTable 2. Other Self-Reported Measures</b> |                         |                                  |                                        |                |                                        |                |
|-----------------------------------------------|-------------------------|----------------------------------|----------------------------------------|----------------|----------------------------------------|----------------|
|                                               |                         | <b>Baseline</b>                  | <b>3 months</b>                        |                | <b>9 months<sup>b</sup></b>            |                |
| <b>Self-report measures</b>                   | <b>Groups</b>           | <b>Mean (SD)</b><br><sup>a</sup> | <b>Difference (95%CI)</b> <sup>b</sup> | <b>P value</b> | <b>Difference (95%CI)</b> <sup>c</sup> | <b>P value</b> |
| Barriers to being active                      | Control                 | 12.3 (5.4)                       | -                                      | -              | -                                      | -              |
|                                               | Regular                 | 13.7 (6.4)                       | -                                      | -              | -                                      | -              |
|                                               | Plus                    | 13.4 (5.3)                       | -                                      | -              | -                                      | -              |
|                                               | Intervention vs Control | -                                | -2.11 (-3.56 to -0.66)                 | .005           | -1.63 (-3.17 to -0.08)                 | .04            |
|                                               | Regular vs Plus         | -                                | -                                      | -              | -0.37 (-2.20 to 1.46)                  | .69            |
| Social Support<br>Family                      | Control                 | 32.0 (9.2)                       | -                                      | -              | -                                      | -              |
|                                               | Regular                 | 31.5 (10.9)                      | -                                      | -              | -                                      | -              |
|                                               | Plus                    | 32.8 (9.2)                       | -                                      | -              | -                                      | -              |
|                                               | Intervention vs Control | -                                | 3.49 (1.27 to 5.71)                    | .002           | -0.92 (-2.94 to 1.09)                  | .37            |
|                                               | Regular vs Plus         | -                                | -                                      | -              | 0.13 (-2.20 to 2.47)                   | .91            |
| Friends                                       | Control                 | 31.1 (8.9)                       | -                                      | -              | -                                      | -              |
|                                               | Regular                 | 31.5 (8.2)                       | -                                      | -              | -                                      | -              |
|                                               | Plus                    | 31.8 (8.1)                       | -                                      | -              | -                                      | -              |
|                                               | Intervention vs Control | -                                | 3.45 (1.51 to 5.40)                    | .001           | 1.00 (-1.09 to 3.09)                   | .35            |
|                                               | Regular vs Plus         | -                                | -                                      | -              | 1.08 (-1.46 to 3.61)                   | .40            |
| Self-efficacy                                 | Control                 | 18.8 (3.9)                       | -                                      | -              | -                                      | -              |
|                                               | Regular                 | 19.8 (5.1)                       | -                                      | -              | -                                      | -              |
|                                               | Plus                    | 19.0 (4.8)                       | -                                      | -              | -                                      | -              |
|                                               | Intervention vs Control | -                                | -1.34 (-2.67 to 0.00)                  | .05            | -1.22 (-2.49 to 0.05)                  | .06            |
|                                               | Regular vs Plus         | -                                | -                                      | -              | 0.7 (-0.79 to 2.18)                    | .35            |
| CES-D                                         | Control                 | 9.3 (7.1)                        | -                                      | -              | -                                      | -              |
|                                               | Regular                 | 8.8 (7.0)                        | -                                      | -              | -                                      | -              |
|                                               | Plus                    | 11.1 (8.5)                       | -                                      | -              | -                                      | -              |
|                                               | Intervention vs Control | -                                | -2.87 (-4.94 to -0.8)                  | .007           | 2.39 (-0.05 to 4.82)                   | .06            |
|                                               | Regular vs Plus         | -                                | -                                      | -              | -1.85 (-4.85 to 1.14)                  | .22            |
| SF-12<br>Mental component score               | Control                 | 47.5 (9.0)                       | -                                      | -              | -                                      | -              |
|                                               | Regular                 | 49.0 (8.8)                       | -                                      | -              | -                                      | -              |
|                                               | Plus                    | 49.1 (9.2)                       | -                                      | -              | -                                      | -              |
|                                               | Intervention vs Control | -                                | 1.89 (-0.54 to 4.31)                   | .13            | -1.08(-3.79 to 1.62)                   | .43            |
|                                               | Regular vs Plus         | -                                | -                                      | -              | -0.32 (-3.5 to 2.85)                   | .84            |
| Physical component score                      | Control                 | 51.5 (6.8)                       | -                                      | -              | -                                      | -              |
|                                               | Regular                 | 52.1 (5.6)                       | -                                      | -              | -                                      | -              |
|                                               | Plus                    | 50.9 (6.1)                       | -                                      | -              | -                                      | -              |
|                                               | Intervention vs Control | -                                | -2.24 (-4.34 to -0.15)                 | .04            | -0.56 (-2.65 to 1.53)                  | .60            |
|                                               | Regular vs Plus         | -                                | -                                      | -              | -0.57 (-2.97 to 1.84)                  | .64            |

Abbreviation: CES-D, Center for Epidemiologic Studies Depression Scale

<sup>a</sup> No difference at baseline ( $P > 0.05$ ) ; <sup>b</sup> Adjusting for baseline value ; <sup>c</sup> Adjusting for 3-month value

**eTable 3. Safety Data Summary**

| <b>eTable 3.a. Safety Data Summary: Adverse Events Checklist (All Events) During 3 Month Intervention</b>                                                                                                                                                                                                                                                                                                |                  |                    |                             |         |
|----------------------------------------------------------------------------------------------------------------------------------------------------------------------------------------------------------------------------------------------------------------------------------------------------------------------------------------------------------------------------------------------------------|------------------|--------------------|-----------------------------|---------|
|                                                                                                                                                                                                                                                                                                                                                                                                          | Total<br>(N=209) | Control<br>(N= 69) | Regular and<br>Plus (N=140) | P value |
| Person Reporting at least one Event                                                                                                                                                                                                                                                                                                                                                                      | 124 ( 0.20)      | 35 ( 0.17)         | 89 ( 0.22)                  | 0.23    |
| <b>Self Reported Event</b>                                                                                                                                                                                                                                                                                                                                                                               | 166 ( 0.27)      | 49 ( 0.24)         | 117 ( 0.28)                 | 0.30    |
| Heart attack                                                                                                                                                                                                                                                                                                                                                                                             | 0 ( 0.00)        | 0 ( 0.00)          | 0 ( 0.00)                   |         |
| Chest pain/angina                                                                                                                                                                                                                                                                                                                                                                                        | 1 ( 0.00)        | 0 ( 0.00)          | 1 ( 0.00)                   | 0.37    |
| Irregular heartbeats                                                                                                                                                                                                                                                                                                                                                                                     | 0 ( 0.00)        | 0 ( 0.00)          | 0 ( 0.00)                   |         |
| Stroke/TIA                                                                                                                                                                                                                                                                                                                                                                                               | 0 ( 0.00)        | 0 ( 0.00)          | 0 ( 0.00)                   |         |
| Outpatient surgery                                                                                                                                                                                                                                                                                                                                                                                       | 6 ( 0.01)        | 3 ( 0.01)          | 3 ( 0.01)                   | 0.39    |
| Fainting/passing out                                                                                                                                                                                                                                                                                                                                                                                     | 1 ( 0.00)        | 1 ( 0.00)          | 0 ( 0.00)                   | 0.14    |
| Dizziness                                                                                                                                                                                                                                                                                                                                                                                                | 13 ( 0.02)       | 3 ( 0.01)          | 10 ( 0.02)                  | 0.45    |
| Shortness breath                                                                                                                                                                                                                                                                                                                                                                                         | 8 ( 0.01)        | 2 ( 0.01)          | 6 ( 0.01)                   | 0.62    |
| Foot pain                                                                                                                                                                                                                                                                                                                                                                                                | 43 ( 0.07)       | 12 ( 0.06)         | 31 ( 0.07)                  | 0.47    |
| Foot ulcer                                                                                                                                                                                                                                                                                                                                                                                               | 0 ( 0.00)        | 0 ( 0.00)          | 0 ( 0.00)                   |         |
| Muscle strain                                                                                                                                                                                                                                                                                                                                                                                            | 23 ( 0.04)       | 6 ( 0.03)          | 17 ( 0.04)                  | 0.53    |
| Joint stiffness/soreness                                                                                                                                                                                                                                                                                                                                                                                 | 47 ( 0.08)       | 13 ( 0.06)         | 34 ( 0.08)                  | 0.37    |
| Extreme fatigue                                                                                                                                                                                                                                                                                                                                                                                          | 1 ( 0.00)        | 0 ( 0.00)          | 1 ( 0.00)                   | 0.37    |
| Back injury                                                                                                                                                                                                                                                                                                                                                                                              | 7 ( 0.01)        | 3 ( 0.01)          | 4 ( 0.01)                   | 0.58    |
| Fracture                                                                                                                                                                                                                                                                                                                                                                                                 | 3 ( 0.00)        | 1 ( 0.00)          | 2 ( 0.00)                   | 0.99    |
| <b>Significant medical or mental problems with restricted walking at least 7 consecutive days?</b>                                                                                                                                                                                                                                                                                                       | 35               | 6 (8.6%)           | 29 (20.0%)                  | 0.05    |
| eTable 3.a. reflects all adverse events (AE) reported by participants during their 1.5 month, 3 month visit, or interim AE events reported prior to 3 month visit. Reported is the number of events and rate per person-month (sum of AE events / sum of follow-up time in month, where follow-up time is AE form date [or actual AE date] minus randomization date). P value is based on Poisson model. |                  |                    |                             |         |

**eTable 3.b. Safety Data Summary: Adverse Events Checklist (All Events) During 6 Month Maintenance**

|                                                                                                    | Total<br>(N=207) | Control<br>(N= 69) | Regular<br>(N= 70) | Plus<br>(N= 68) | P value |
|----------------------------------------------------------------------------------------------------|------------------|--------------------|--------------------|-----------------|---------|
| <b>Person Reporting at least one Event</b>                                                         | 159 ( 0.13)      | 49 ( 0.11)         | 56 ( 0.14)         | 54 ( 0.13)      | 0.46    |
| <b>Self Reported Event</b>                                                                         | 211 ( 0.17)      | 60 ( 0.13)         | 78 ( 0.19)         | 73 ( 0.18)      | 0.09    |
| Heart attack                                                                                       | 0 ( 0.00)        | 0 ( 0.00)          | 0 ( 0.00)          | 0 ( 0.00)       |         |
| Chest pain/angina                                                                                  | 6 ( 0.00)        | 2 ( 0.00)          | 2 ( 0.00)          | 2 ( 0.00)       | 1.00    |
| Irregular heartbeats                                                                               | 7 ( 0.01)        | 2 ( 0.00)          | 2 ( 0.00)          | 3 ( 0.01)       | 0.84    |
| Stroke/TIA                                                                                         | 0 ( 0.00)        | 0 ( 0.00)          | 0 ( 0.00)          | 0 ( 0.00)       |         |
| Outpatient surgery                                                                                 | 6 ( 0.00)        | 0 ( 0.00)          | 2 ( 0.00)          | 4 ( 0.01)       | 0.06    |
| Fainting/passing out                                                                               | 2 ( 0.00)        | 0 ( 0.00)          | 2 ( 0.00)          | 0 ( 0.00)       | 0.12    |
| Dizziness                                                                                          | 22 ( 0.02)       | 6 ( 0.01)          | 11 ( 0.03)         | 5 ( 0.01)       | 0.30    |
| Shortness breath                                                                                   | 9 ( 0.01)        | 3 ( 0.01)          | 1 ( 0.00)          | 5 ( 0.01)       | 0.21    |
| Foot pain                                                                                          | 41 ( 0.03)       | 13 ( 0.03)         | 15 ( 0.04)         | 13 ( 0.03)      | 0.89    |
| Foot ulcer                                                                                         | 0 ( 0.00)        | 0 ( 0.00)          | 0 ( 0.00)          | 0 ( 0.00)       |         |
| Muscle strain                                                                                      | 37 ( 0.03)       | 11 ( 0.03)         | 12 ( 0.03)         | 14 ( 0.04)      | 0.76    |
| Joint stiffness/soreness                                                                           | 46 ( 0.04)       | 14 ( 0.03)         | 17 ( 0.04)         | 15 ( 0.04)      | 0.84    |
| Extreme fatigue                                                                                    | 20 ( 0.02)       | 6 ( 0.01)          | 8 ( 0.02)          | 6 ( 0.01)       | 0.84    |
| Back injury                                                                                        | 11 ( 0.01)       | 3 ( 0.01)          | 4 ( 0.01)          | 4 ( 0.01)       | 0.90    |
| Fracture                                                                                           | 4 ( 0.00)        | 0 ( 0.00)          | 2 ( 0.00)          | 2 ( 0.00)       | 0.20    |
| <b>Significant medical or mental problems with restricted walking at least 7 consecutive days?</b> | 68               | 21 (26.9%)         | 23 (30.7%)         | 24 (32.9%)      | 0.71    |

eTable 3.b. reflects all adverse events (AE) reported by participants during their 5 month, 7 month, 9 month visit, or interim AE events reported between 3 month and 9 month visit. Reported is the number of events and rate per person-month (sum of AE events / sum of follow-up time in month, where follow-up time is AE form date [or actual AE date] - month 3 visit date). P value is based on Poisson model.

| <b>eTable 3.c. Safety Data Summary: Adverse Event Checklist (First Event) During 3 Month Intervention</b>                                                                                                                                                                                                                                                                                                     |                  |                    |                             |         |
|---------------------------------------------------------------------------------------------------------------------------------------------------------------------------------------------------------------------------------------------------------------------------------------------------------------------------------------------------------------------------------------------------------------|------------------|--------------------|-----------------------------|---------|
|                                                                                                                                                                                                                                                                                                                                                                                                               | Total<br>(N=209) | Control<br>(N= 69) | Regular and<br>Plus (N=140) | P value |
| Person Reporting at least one Event                                                                                                                                                                                                                                                                                                                                                                           | 101 ( 0.18)      | 29 ( 0.16)         | 72 ( 0.20)                  | 0.26    |
| <b>Self Reported Event</b>                                                                                                                                                                                                                                                                                                                                                                                    | 151 ( 0.28)      | 46 ( 0.25)         | 105 ( 0.29)                 | 0.36    |
| Heart attack                                                                                                                                                                                                                                                                                                                                                                                                  | 0 ( 0.00)        | 0 ( 0.00)          | 0 ( 0.00)                   |         |
| Chest pain/angina                                                                                                                                                                                                                                                                                                                                                                                             | 1 ( 0.00)        | 0 ( 0.00)          | 1 ( 0.00)                   | 0.37    |
| Irregular heartbeats                                                                                                                                                                                                                                                                                                                                                                                          | 0 ( 0.00)        | 0 ( 0.00)          | 0 ( 0.00)                   |         |
| Stroke/TIA                                                                                                                                                                                                                                                                                                                                                                                                    | 0 ( 0.00)        | 0 ( 0.00)          | 0 ( 0.00)                   |         |
| Outpatient surgery                                                                                                                                                                                                                                                                                                                                                                                            | 6 ( 0.01)        | 3 ( 0.01)          | 3 ( 0.01)                   | 0.39    |
| Fainting/passing out                                                                                                                                                                                                                                                                                                                                                                                          | 1 ( 0.00)        | 1 ( 0.00)          | 0 ( 0.00)                   | 0.14    |
| Dizziness                                                                                                                                                                                                                                                                                                                                                                                                     | 12 ( 0.02)       | 3 ( 0.01)          | 9 ( 0.02)                   | 0.56    |
| Shortness breath                                                                                                                                                                                                                                                                                                                                                                                              | 8 ( 0.01)        | 2 ( 0.01)          | 6 ( 0.01)                   | 0.62    |
| Foot pain                                                                                                                                                                                                                                                                                                                                                                                                     | 36 ( 0.06)       | 10 ( 0.05)         | 26 ( 0.07)                  | 0.49    |
| Foot ulcer                                                                                                                                                                                                                                                                                                                                                                                                    | 0 ( 0.00)        | 0 ( 0.00)          | 0 ( 0.00)                   |         |
| Muscle strain                                                                                                                                                                                                                                                                                                                                                                                                 | 21 ( 0.03)       | 6 ( 0.03)          | 15 ( 0.04)                  | 0.71    |
| Joint stiffness/soreness                                                                                                                                                                                                                                                                                                                                                                                      | 42 ( 0.07)       | 12 ( 0.06)         | 30 ( 0.08)                  | 0.44    |
| Extreme fatigue                                                                                                                                                                                                                                                                                                                                                                                               | 14 ( 0.02)       | 5 ( 0.02)          | 9 ( 0.02)                   | 0.83    |
| Back injury                                                                                                                                                                                                                                                                                                                                                                                                   | 7 ( 0.01)        | 3 ( 0.01)          | 4 ( 0.01)                   | 0.58    |
| Fracture                                                                                                                                                                                                                                                                                                                                                                                                      | 3 ( 0.00)        | 1 ( 0.00)          | 2 ( 0.00)                   | 0.99    |
| <b>Significant medical or mental problems with restricted walking at least 7 consecutive days?</b>                                                                                                                                                                                                                                                                                                            | 29               | 5 (7.2%)           | 24 (17.1%)                  | 0.06    |
| eTable 3.c. reflects the first adverse event (AE) reported by participants during their 1.5 month, 3 month visit, or interim AE events reported prior to 3 month visit. Reported is the number of events and rate per person-month (sum of AE events / sum of follow-up time in month, where follow-up time is AE form date [or actual AE date] minus randomization date). P value is based on Poisson model. |                  |                    |                             |         |

**eTable 3.d. Safety Data Summary: Adverse Event Checklist (First Event) During 6 Month Maintenance**

|                                                                                                    | Total<br>(N=207) | Control<br>(N= 69) | Regular<br>(N= 70) | Plus<br>(N= 68) | P value |
|----------------------------------------------------------------------------------------------------|------------------|--------------------|--------------------|-----------------|---------|
| <b>Person Reporting at least one Event</b>                                                         | 109 ( 0.11)      | 31 ( 0.09)         | 39 ( 0.12)         | 39 ( 0.12)      | 0.2957  |
| <b>Self Reported Event</b>                                                                         | 190 ( 0.19)      | 52 ( 0.15)         | 72 ( 0.23)         | 66 ( 0.20)      | 0.0483  |
| Heart attack                                                                                       | 0 ( 0.00)        | 0 ( 0.00)          | 0 ( 0.00)          | 0 ( 0.00)       |         |
| Chest pain/angina                                                                                  | 6 ( 0.00)        | 2 ( 0.00)          | 2 ( 0.00)          | 2 ( 0.00)       | 0.9992  |
| Irregular heartbeats                                                                               | 7 ( 0.01)        | 2 ( 0.00)          | 2 ( 0.00)          | 3 ( 0.01)       | 0.8451  |
| Stroke/TIA                                                                                         | 0 ( 0.00)        | 0 ( 0.00)          | 0 ( 0.00)          | 0 ( 0.00)       |         |
| Outpatient surgery                                                                                 | 6 ( 0.00)        | 0 ( 0.00)          | 2 ( 0.00)          | 4 ( 0.01)       | 0.0577  |
| Fainting/passing out                                                                               | 2 ( 0.00)        | 0 ( 0.00)          | 2 ( 0.00)          | 0 ( 0.00)       | 0.1149  |
| Dizziness                                                                                          | 21 ( 0.02)       | 6 ( 0.01)          | 10 ( 0.02)         | 5 ( 0.01)       | 0.4155  |
| Shortness breath                                                                                   | 8 ( 0.01)        | 3 ( 0.01)          | 1 ( 0.00)          | 4 ( 0.01)       | 0.3357  |
| Foot pain                                                                                          | 38 ( 0.03)       | 11 ( 0.03)         | 15 ( 0.04)         | 12 ( 0.03)      | 0.7260  |
| Foot ulcer                                                                                         | 0 ( 0.00)        | 0 ( 0.00)          | 0 ( 0.00)          | 0 ( 0.00)       |         |
| Muscle strain                                                                                      | 33 ( 0.03)       | 9 ( 0.02)          | 12 ( 0.03)         | 12 ( 0.03)      | 0.7101  |
| Joint stiffness/soreness                                                                           | 37 ( 0.03)       | 11 ( 0.03)         | 14 ( 0.04)         | 12 ( 0.03)      | 0.8236  |
| Extreme fatigue                                                                                    | 19 ( 0.02)       | 6 ( 0.01)          | 7 ( 0.02)          | 6 ( 0.01)       | 0.9533  |
| Back injury                                                                                        | 10 ( 0.01)       | 2 ( 0.00)          | 4 ( 0.01)          | 4 ( 0.01)       | 0.6385  |
| Fracture                                                                                           | 3 ( 0.00)        | 0 ( 0.00)          | 1 ( 0.00)          | 2 ( 0.00)       | 0.2417  |
| <b>Significant medical or mental problems with restricted walking at least 7 consecutive days?</b> | 49               | 12 (17.4%)         | 18 (25.7%)         | 19 (27.9%)      | 0.3065  |

eTable 3.d. reflects the first adverse event (AE) reported by participants during their 5 month, 7 month, 9 month visit, or interim AE events reported between 3 month and 9 month visit. Reported is the number of events and rate per person-month (sum of AE events / sum of follow-up time in month, where follow-up time is AE form date [or actual AE date] - month 3 visit date). P value is based on Poisson model.

**eTable 3.e. Safety Data Summary: Adverse Event Emergency Department or Urgent Care Facility Visits During 3 Month Intervention**

|                                                                                                                          | Total<br>(N=209) | Control<br>(N= 69) | Regular and<br>Plus<br>(N=140) | P value |
|--------------------------------------------------------------------------------------------------------------------------|------------------|--------------------|--------------------------------|---------|
| <b>Total number of emergency department or urgent care facility visits</b>                                               | 12               | 3                  | 9                              |         |
| <b>Total number of participants with emergency department or urgent care facility visits</b>                             | 11               | 2                  | 9                              |         |
| <b>Total number of emergency department or urgent care facility visits due to an event that occurred during exercise</b> | 1                | 0                  | 1                              |         |
| <b>Relationship between emergency department or urgent care facility visits and intervention</b>                         |                  |                    |                                |         |
| Unknown                                                                                                                  | 0                | 0 (0.0%)           | 0 (0.0%)                       |         |
| Not related                                                                                                              | 11               | 3 (100%)           | 8 (88.9%)                      | 0.5465  |
| Possible                                                                                                                 | 1                | 0 (0.0%)           | 1 (11.1%)                      |         |
| Probable                                                                                                                 | 0                | 0 (0.0%)           | 0 (0.0%)                       |         |
| Definite                                                                                                                 | 0                | 0 (0.0%)           | 0 (0.0%)                       |         |

eTable 3.e. reflects emergency department visits that occurred during the 3 month intervention period, including interim reports. Frequency and percent are shown, where percentages are computed based on the total number of events reported. Only this category had sufficient sample size for statistical analysis. P value is based on Poisson model.



| <b>eTable 3.f. Safety Data Summary: Adverse Events Emergency Department or Urgent Care Facility Visits During 6 Month Maintenance</b>                                                                                                                                                                                                                                    |                  |                    |                    |                 |         |
|--------------------------------------------------------------------------------------------------------------------------------------------------------------------------------------------------------------------------------------------------------------------------------------------------------------------------------------------------------------------------|------------------|--------------------|--------------------|-----------------|---------|
|                                                                                                                                                                                                                                                                                                                                                                          | Total<br>(N=207) | Control<br>(N= 69) | Regular<br>(N= 70) | Plus<br>(N= 68) | P value |
| <b>Total number of emergency department or urgent care facility visits</b>                                                                                                                                                                                                                                                                                               | 24               | 5                  | 10                 | 9               |         |
| <b>Total number of participants with emergency department or urgent care facility visits</b>                                                                                                                                                                                                                                                                             | 23               | 4                  | 10                 | 9               |         |
| <b>Total number of emergency department or urgent care facility visits due to an event that occurred during exercise</b>                                                                                                                                                                                                                                                 | 2                | 0                  | 2                  | 0               |         |
| <b>Relationship between emergency department or urgent care facility visits and intervention</b>                                                                                                                                                                                                                                                                         |                  |                    |                    |                 |         |
| Unknown                                                                                                                                                                                                                                                                                                                                                                  | 0                | 0 (0.0%)           | 0 (0.0%)           | 0 (0.0%)        |         |
| Not related                                                                                                                                                                                                                                                                                                                                                              | 22               | 5 (100%)           | 8 (80.0%)          | 9 (100%)        | 0.55    |
| Possible                                                                                                                                                                                                                                                                                                                                                                 | 1                | 0 (0.0%)           | 1 (10.0%)          | 0 (0.0%)        |         |
| Probable                                                                                                                                                                                                                                                                                                                                                                 | 0                | 0 (0.0%)           | 0 (0.0%)           | 0 (0.0%)        |         |
| Definite                                                                                                                                                                                                                                                                                                                                                                 | 0                | 0 (0.0%)           | 0 (0.0%)           | 0 (0.0%)        |         |
| eTable 3.f. reflects emergency department visits that occurred between 3 month and 9 month visit, including interim reports during this period. Frequency and percent are shown, where percentages are computed based on the total number of events reported. Only this category had sufficient sample size for statistical analysis. P value is based on Poisson model. |                  |                    |                    |                 |         |

**eTable 3.g. Safety Data Summary: Adverse Event Hospitalizations During 3 Month Intervention**

|                                                                                      | Total<br>(N=209) | Control<br>(N= 69) | Regular and<br>Plus<br>(N=140) | P value |
|--------------------------------------------------------------------------------------|------------------|--------------------|--------------------------------|---------|
| <b>Total number of hospitalization</b>                                               | 1                | 0                  | 1                              |         |
| <b>Total number of participants hospitalization</b>                                  | 1                | 0                  | 1                              |         |
| <b>Total number of hospitalization due to an event that occurred during exercise</b> | 0                | 0                  | 0                              |         |
| <b>Relationship between hospitalization and intervention</b>                         | 0                | 0                  | 0                              |         |
| Unknown                                                                              | 0                | 0 (0.0%)           | 0 (0.0%)                       |         |
| Not related                                                                          | 1                | 0 (0.0%)           | 1 (100%)                       |         |
| Possible                                                                             | 0                | 0 (0.0%)           | 0 (0.0%)                       |         |
| Probable                                                                             | 0                | 0 (0.0%)           | 0 (0.0%)                       |         |
| Definite                                                                             | 0                | 0 (0.0%)           | 0 (0.0%)                       |         |

eTable 3.g. reflects hospitalizations that occurred post-randomization during the 3 month intervention period, including interim reports during this period. Frequency and percent are shown, where percentages are computed based on the total number of events reported.

| <b>eTable 3.h. Safety Data Summary: Adverse Event Hospitalizations During 6 Month Maintenance</b>                                                                                                                       |                  |                    |                    |                 |         |
|-------------------------------------------------------------------------------------------------------------------------------------------------------------------------------------------------------------------------|------------------|--------------------|--------------------|-----------------|---------|
|                                                                                                                                                                                                                         | Total<br>(N=207) | Control<br>(N= 69) | Regular<br>(N= 70) | Plus<br>(N= 68) | P value |
| <b>Total number of hospitalization</b>                                                                                                                                                                                  | 5                | 4                  | 1                  | 0               |         |
| <b>Total number of participants hospitalization</b>                                                                                                                                                                     | 4                | 3                  | 1                  | 0               |         |
| <b>Total number of hospitalization due to an event that occurred during exercise</b>                                                                                                                                    | 0                | 0                  | 0                  | 0               |         |
| <b>Relationship between hospitalization and intervention</b>                                                                                                                                                            | 0                | 0                  | 0                  | 0               |         |
| Unknown                                                                                                                                                                                                                 | 0                | 0 (0.0%)           | 0 (0.0%)           | 0 (0.0%)        |         |
| Not related                                                                                                                                                                                                             | 5                | 4 (100%)           | 1 (100%)           | 0 (0.0%)        |         |
| Possible                                                                                                                                                                                                                | 0                | 0 (0.0%)           | 0 (0.0%)           | 0 (0.0%)        |         |
| Probable                                                                                                                                                                                                                | 0                | 0 (0.0%)           | 0 (0.0%)           | 0 (0.0%)        |         |
| Definite                                                                                                                                                                                                                | 0                | 0 (0.0%)           | 0 (0.0%)           | 0 (0.0%)        |         |
| eTable 3.h. reflects hospitalizations that occurred post-randomization between 3 month and 9 month visit. Frequency and percent are shown, where percentages are computed based on the total number of events reported. |                  |                    |                    |                 |         |

| <b>eTable 3.i. Safety Data Summary: Adverse Events Checklist (All Events) During 3 Month Intervention</b>                                                                                                                                                                                                                                                                                                |                  |                    |                             |         |
|----------------------------------------------------------------------------------------------------------------------------------------------------------------------------------------------------------------------------------------------------------------------------------------------------------------------------------------------------------------------------------------------------------|------------------|--------------------|-----------------------------|---------|
|                                                                                                                                                                                                                                                                                                                                                                                                          | Total<br>(N=209) | Control<br>(N= 69) | Regular and<br>Plus (N=140) | P value |
| Person Reporting at least one Event                                                                                                                                                                                                                                                                                                                                                                      | 124 ( 0.20)      | 35 ( 0.17)         | 89 ( 0.22)                  | 0.23    |
| <b>Self Reported Event</b>                                                                                                                                                                                                                                                                                                                                                                               | 166 ( 0.27)      | 49 ( 0.24)         | 117 ( 0.28)                 | 0.30    |
| Heart attack                                                                                                                                                                                                                                                                                                                                                                                             | 0 ( 0.00)        | 0 ( 0.00)          | 0 ( 0.00)                   |         |
| Chest pain/angina                                                                                                                                                                                                                                                                                                                                                                                        | 1 ( 0.00)        | 0 ( 0.00)          | 1 ( 0.00)                   | 0.37    |
| Irregular heartbeats                                                                                                                                                                                                                                                                                                                                                                                     | 0 ( 0.00)        | 0 ( 0.00)          | 0 ( 0.00)                   |         |
| Stroke/TIA                                                                                                                                                                                                                                                                                                                                                                                               | 0 ( 0.00)        | 0 ( 0.00)          | 0 ( 0.00)                   |         |
| Outpatient surgery                                                                                                                                                                                                                                                                                                                                                                                       | 6 ( 0.01)        | 3 ( 0.01)          | 3 ( 0.01)                   | 0.39    |
| Fainting/passing out                                                                                                                                                                                                                                                                                                                                                                                     | 1 ( 0.00)        | 1 ( 0.00)          | 0 ( 0.00)                   | 0.14    |
| Dizziness                                                                                                                                                                                                                                                                                                                                                                                                | 13 ( 0.02)       | 3 ( 0.01)          | 10 ( 0.02)                  | 0.45    |
| Shortness breath                                                                                                                                                                                                                                                                                                                                                                                         | 8 ( 0.01)        | 2 ( 0.01)          | 6 ( 0.01)                   | 0.62    |
| Foot pain                                                                                                                                                                                                                                                                                                                                                                                                | 43 ( 0.07)       | 12 ( 0.06)         | 31 ( 0.07)                  | 0.47    |
| Foot ulcer                                                                                                                                                                                                                                                                                                                                                                                               | 0 ( 0.00)        | 0 ( 0.00)          | 0 ( 0.00)                   |         |
| Muscle strain                                                                                                                                                                                                                                                                                                                                                                                            | 23 ( 0.04)       | 6 ( 0.03)          | 17 ( 0.04)                  | 0.53    |
| Joint stiffness/soreness                                                                                                                                                                                                                                                                                                                                                                                 | 47 ( 0.08)       | 13 ( 0.06)         | 34 ( 0.08)                  | 0.37    |
| Extreme fatigue                                                                                                                                                                                                                                                                                                                                                                                          | 1 ( 0.00)        | 0 ( 0.00)          | 1 ( 0.00)                   | 0.37    |
| Back injury                                                                                                                                                                                                                                                                                                                                                                                              | 7 ( 0.01)        | 3 ( 0.01)          | 4 ( 0.01)                   | 0.58    |
| Fracture                                                                                                                                                                                                                                                                                                                                                                                                 | 3 ( 0.00)        | 1 ( 0.00)          | 2 ( 0.00)                   | 0.99    |
| <b>Significant medical or mental problems with restricted walking at least 7 consecutive days?</b>                                                                                                                                                                                                                                                                                                       | 35               | 6 (8.6%)           | 29 (20.0%)                  | 0.05    |
| eTable 3.i. reflects all adverse events (AE) reported by participants during their 1.5 month, 3 month visit, or interim AE events reported prior to 3 month visit. Reported is the number of events and rate per person-month (sum of AE events / sum of follow-up time in month, where follow-up time is AE form date [or actual AE date] minus randomization date). P value is based on Poisson model. |                  |                    |                             |         |

| <b>eTable 3.j. Safety Data Summary: Adverse Events Checklist (All Events) During 6 Month Maintenance</b> |                  |                    |                    |                 |         |
|----------------------------------------------------------------------------------------------------------|------------------|--------------------|--------------------|-----------------|---------|
|                                                                                                          | Total<br>(N=207) | Control<br>(N= 69) | Regular<br>(N= 70) | Plus<br>(N= 68) | P value |
| <b>Person Reporting at least one Event</b>                                                               | 159 ( 0.13)      | 49 ( 0.11)         | 56 ( 0.14)         | 54 ( 0.13)      | 0.47    |
| <b>Self Reported Event</b>                                                                               | 211 ( 0.17)      | 60 ( 0.13)         | 78 ( 0.19)         | 73 ( 0.18)      | 0.09    |
| Heart attack                                                                                             | 0 ( 0.00)        | 0 ( 0.00)          | 0 ( 0.00)          | 0 ( 0.00)       |         |
| Chest pain/angina                                                                                        | 6 ( 0.00)        | 2 ( 0.00)          | 2 ( 0.00)          | 2 ( 0.00)       | 1.00    |
| Irregular heartbeats                                                                                     | 7 ( 0.01)        | 2 ( 0.00)          | 2 ( 0.00)          | 3 ( 0.01)       | 0.85    |
| Stroke/TIA                                                                                               | 0 ( 0.00)        | 0 ( 0.00)          | 0 ( 0.00)          | 0 ( 0.00)       |         |
| Outpatient surgery                                                                                       | 6 ( 0.00)        | 0 ( 0.00)          | 2 ( 0.00)          | 4 ( 0.01)       | 0.06    |
| Fainting/passing out                                                                                     | 2 ( 0.00)        | 0 ( 0.00)          | 2 ( 0.00)          | 0 ( 0.00)       | 0.12    |
| Dizziness                                                                                                | 22 ( 0.02)       | 6 ( 0.01)          | 11 ( 0.03)         | 5 ( 0.01)       | 0.30    |
| Shortness breath                                                                                         | 9 ( 0.01)        | 3 ( 0.01)          | 1 ( 0.00)          | 5 ( 0.01)       | 0.21    |
| Foot pain                                                                                                | 41 ( 0.03)       | 13 ( 0.03)         | 15 ( 0.04)         | 13 ( 0.03)      | 0.89    |
| Foot ulcer                                                                                               | 0 ( 0.00)        | 0 ( 0.00)          | 0 ( 0.00)          | 0 ( 0.00)       |         |
| Muscle strain                                                                                            | 37 ( 0.03)       | 11 ( 0.03)         | 12 ( 0.03)         | 14 ( 0.04)      | 0.76    |
| Joint stiffness/soreness                                                                                 | 46 ( 0.04)       | 14 ( 0.03)         | 17 ( 0.04)         | 15 ( 0.04)      | 0.84    |
| Extreme fatigue                                                                                          | 20 ( 0.02)       | 6 ( 0.01)          | 8 ( 0.02)          | 6 ( 0.01)       | 0.84    |
| Back injury                                                                                              | 11 ( 0.01)       | 3 ( 0.01)          | 4 ( 0.01)          | 4 ( 0.01)       | 0.90    |
| Fracture                                                                                                 | 4 ( 0.00)        | 0 ( 0.00)          | 2 ( 0.00)          | 2 ( 0.00)       | 0.20    |
| <b>Significant medical or mental problems with restricted walking at least 7 consecutive days?</b>       | 68               | 21 (26.9%)         | 23 (30.7%)         | 24 (32.9%)      | 0.71    |

eTable 3.j. reflects all adverse events (AE) reported by participants during their 5 month, 7 month, 9 month visit, or interim AE events reported between 3 month and 9 month visit. Reported is the number of events and rate per person-month (sum of AE events / sum of follow-up time in month, where follow-up time is AE form date [or actual AE date] - month 3 visit date). P value is based on Poisson model.

| <b>eTable 3.k. Safety Data Summary: Adverse Event Checklist (First Event) During 3 Month Intervention</b>                                                                                                                                                                                                                                                                                                     |                  |                    |                             |         |
|---------------------------------------------------------------------------------------------------------------------------------------------------------------------------------------------------------------------------------------------------------------------------------------------------------------------------------------------------------------------------------------------------------------|------------------|--------------------|-----------------------------|---------|
|                                                                                                                                                                                                                                                                                                                                                                                                               | Total<br>(N=209) | Control<br>(N= 69) | Regular and<br>Plus (N=140) | P value |
| Person Reporting at least one Event                                                                                                                                                                                                                                                                                                                                                                           | 101 ( 0.18)      | 29 ( 0.16)         | 72 ( 0.20)                  | 0.26    |
| <b>Self Reported Event</b>                                                                                                                                                                                                                                                                                                                                                                                    | 151 ( 0.28)      | 46 ( 0.25)         | 105 ( 0.29)                 | 0.36    |
| Heart attack                                                                                                                                                                                                                                                                                                                                                                                                  | 0 ( 0.00)        | 0 ( 0.00)          | 0 ( 0.00)                   |         |
| Chest pain/angina                                                                                                                                                                                                                                                                                                                                                                                             | 1 ( 0.00)        | 0 ( 0.00)          | 1 ( 0.00)                   | 0.37    |
| Irregular heartbeats                                                                                                                                                                                                                                                                                                                                                                                          | 0 ( 0.00)        | 0 ( 0.00)          | 0 ( 0.00)                   |         |
| Stroke/TIA                                                                                                                                                                                                                                                                                                                                                                                                    | 0 ( 0.00)        | 0 ( 0.00)          | 0 ( 0.00)                   |         |
| Outpatient surgery                                                                                                                                                                                                                                                                                                                                                                                            | 6 ( 0.01)        | 3 ( 0.01)          | 3 ( 0.01)                   | 0.39    |
| Fainting/passing out                                                                                                                                                                                                                                                                                                                                                                                          | 1 ( 0.00)        | 1 ( 0.00)          | 0 ( 0.00)                   | 0.14    |
| Dizziness                                                                                                                                                                                                                                                                                                                                                                                                     | 12 ( 0.02)       | 3 ( 0.01)          | 9 ( 0.02)                   | 0.56    |
| Shortness breath                                                                                                                                                                                                                                                                                                                                                                                              | 8 ( 0.01)        | 2 ( 0.01)          | 6 ( 0.01)                   | 0.62    |
| Foot pain                                                                                                                                                                                                                                                                                                                                                                                                     | 36 ( 0.06)       | 10 ( 0.05)         | 26 ( 0.07)                  | 0.49    |
| Foot ulcer                                                                                                                                                                                                                                                                                                                                                                                                    | 0 ( 0.00)        | 0 ( 0.00)          | 0 ( 0.00)                   |         |
| Muscle strain                                                                                                                                                                                                                                                                                                                                                                                                 | 21 ( 0.03)       | 6 ( 0.03)          | 15 ( 0.04)                  | 0.71    |
| Joint stiffness/soreness                                                                                                                                                                                                                                                                                                                                                                                      | 42 ( 0.07)       | 12 ( 0.06)         | 30 ( 0.08)                  | 0.44    |
| Extreme fatigue                                                                                                                                                                                                                                                                                                                                                                                               | 14 ( 0.02)       | 5 ( 0.02)          | 9 ( 0.02)                   | 0.83    |
| Back injury                                                                                                                                                                                                                                                                                                                                                                                                   | 7 ( 0.01)        | 3 ( 0.01)          | 4 ( 0.01)                   | 0.58    |
| Fracture                                                                                                                                                                                                                                                                                                                                                                                                      | 3 ( 0.00)        | 1 ( 0.00)          | 2 ( 0.00)                   | 0.99    |
| <b>Significant medical or mental problems with restricted walking at least 7 consecutive days?</b>                                                                                                                                                                                                                                                                                                            | 29               | 5 (7.2%)           | 24 (17.1%)                  | 0.06    |
| eTable 3.k. reflects the first adverse event (AE) reported by participants during their 1.5 month, 3 month visit, or interim AE events reported prior to 3 month visit. Reported is the number of events and rate per person-month (sum of AE events / sum of follow-up time in month, where follow-up time is AE form date [or actual AE date] minus randomization date). P value is based on Poisson model. |                  |                    |                             |         |

| <b>eTable 3.1. Safety Data Summary: Adverse Event Checklist (First Event) During 6 Month Maintenance</b> |                  |                    |                    |                 |         |
|----------------------------------------------------------------------------------------------------------|------------------|--------------------|--------------------|-----------------|---------|
|                                                                                                          | Total<br>(N=207) | Control<br>(N= 69) | Regular<br>(N= 70) | Plus<br>(N= 68) | P value |
| <b>Person Reporting at least one Event</b>                                                               | 109 ( 0.11)      | 31 ( 0.09)         | 39 ( 0.12)         | 39 ( 0.12)      | 0.30    |
| <b>Self Reported Event</b>                                                                               | 190 ( 0.19)      | 52 ( 0.15)         | 72 ( 0.23)         | 66 ( 0.20)      | 0.05    |
| Heart attack                                                                                             | 0 ( 0.00)        | 0 ( 0.00)          | 0 ( 0.00)          | 0 ( 0.00)       |         |
| Chest pain/angina                                                                                        | 6 ( 0.00)        | 2 ( 0.00)          | 2 ( 0.00)          | 2 ( 0.00)       | 1.00    |
| Irregular heartbeats                                                                                     | 7 ( 0.01)        | 2 ( 0.00)          | 2 ( 0.00)          | 3 ( 0.01)       | 0.85    |
| Stroke/TIA                                                                                               | 0 ( 0.00)        | 0 ( 0.00)          | 0 ( 0.00)          | 0 ( 0.00)       |         |
| Outpatient surgery                                                                                       | 6 ( 0.00)        | 0 ( 0.00)          | 2 ( 0.00)          | 4 ( 0.01)       | 0.06    |
| Fainting/passing out                                                                                     | 2 ( 0.00)        | 0 ( 0.00)          | 2 ( 0.00)          | 0 ( 0.00)       | 0.12    |
| Dizziness                                                                                                | 21 ( 0.02)       | 6 ( 0.01)          | 10 ( 0.02)         | 5 ( 0.01)       | 0.42    |
| Shortness breath                                                                                         | 8 ( 0.01)        | 3 ( 0.01)          | 1 ( 0.00)          | 4 ( 0.01)       | 0.34    |
| Foot pain                                                                                                | 38 ( 0.03)       | 11 ( 0.03)         | 15 ( 0.04)         | 12 ( 0.03)      | 0.73    |
| Foot ulcer                                                                                               | 0 ( 0.00)        | 0 ( 0.00)          | 0 ( 0.00)          | 0 ( 0.00)       |         |
| Muscle strain                                                                                            | 33 ( 0.03)       | 9 ( 0.02)          | 12 ( 0.03)         | 12 ( 0.03)      | 0.71    |
| Joint stiffness/soreness                                                                                 | 37 ( 0.03)       | 11 ( 0.03)         | 14 ( 0.04)         | 12 ( 0.03)      | 0.82    |
| Extreme fatigue                                                                                          | 19 ( 0.02)       | 6 ( 0.01)          | 7 ( 0.02)          | 6 ( 0.01)       | 0.95    |
| Back injury                                                                                              | 10 ( 0.01)       | 2 ( 0.00)          | 4 ( 0.01)          | 4 ( 0.01)       | 0.64    |
| Fracture                                                                                                 | 3 ( 0.00)        | 0 ( 0.00)          | 1 ( 0.00)          | 2 ( 0.00)       | 0.24    |
| <b>Significant medical or mental problems with restricted walking at least 7 consecutive days?</b>       | 49               | 12 (17.4%)         | 18 (25.7%)         | 19 (27.9%)      | 0.31    |

eTable 3.1. reflects the first adverse event (AE) reported by participants during their 5 month, 7 month, 9 month visit, or interim AE events reported between 3 month and 9 month visit. Reported is the number of events and rate per person-month (sum of AE events / sum of follow-up time in month, where follow-up time is AE form date [or actual AE date] - month 3 visit date). P value is based on Poisson model.

| <b>eTable 3.m. Safety Data Summary: Adverse Event Emergency Department or Urgent Care Facility Visits During 3 Month Intervention</b>                                                                                                                                                                                                                      |                  |                    |                                |         |
|------------------------------------------------------------------------------------------------------------------------------------------------------------------------------------------------------------------------------------------------------------------------------------------------------------------------------------------------------------|------------------|--------------------|--------------------------------|---------|
|                                                                                                                                                                                                                                                                                                                                                            | Total<br>(N=209) | Control<br>(N= 69) | Regular and<br>Plus<br>(N=140) | P value |
| <b>Total number of emergency department or urgent care facility visits</b>                                                                                                                                                                                                                                                                                 | 12               | 3                  | 9                              |         |
| <b>Total number of participants with emergency department or urgent care facility visits</b>                                                                                                                                                                                                                                                               | 11               | 2                  | 9                              |         |
| <b>Total number of emergency department or urgent care facility visits due to an event that occurred during exercise</b>                                                                                                                                                                                                                                   | 1                | 0                  | 1                              |         |
| <b>Relationship between emergency department or urgent care facility visits and intervention</b>                                                                                                                                                                                                                                                           |                  |                    |                                |         |
| Unknown                                                                                                                                                                                                                                                                                                                                                    | 0                | 0 (0.0%)           | 0 (0.0%)                       |         |
| Not related                                                                                                                                                                                                                                                                                                                                                | 11               | 3 (100%)           | 8 (88.9%)                      | 0.55    |
| Possible                                                                                                                                                                                                                                                                                                                                                   | 1                | 0 (0.0%)           | 1 (11.1%)                      |         |
| Probable                                                                                                                                                                                                                                                                                                                                                   | 0                | 0 (0.0%)           | 0 (0.0%)                       |         |
| Definite                                                                                                                                                                                                                                                                                                                                                   | 0                | 0 (0.0%)           | 0 (0.0%)                       |         |
| eTable 3.m. reflects emergency department visits that occurred during the 3 month intervention period, including interim reports. Frequency and percent are shown, where percentages are computed based on the total number of events reported. Only this category had sufficient sample size for statistical analysis. P value is based on Poisson model. |                  |                    |                                |         |



| <b>eTable 3.n. Safety Data Summary: Adverse Events Emergency Department or Urgent Care Facility Visits During 6 Month Maintenance</b>                                                                                                                                                                                                                                    |                  |                    |                    |                 |         |
|--------------------------------------------------------------------------------------------------------------------------------------------------------------------------------------------------------------------------------------------------------------------------------------------------------------------------------------------------------------------------|------------------|--------------------|--------------------|-----------------|---------|
|                                                                                                                                                                                                                                                                                                                                                                          | Total<br>(N=207) | Control<br>(N= 69) | Regular<br>(N= 70) | Plus<br>(N= 68) | P value |
| <b>Total number of emergency department or urgent care facility visits</b>                                                                                                                                                                                                                                                                                               | 24               | 5                  | 10                 | 9               |         |
| <b>Total number of participants with emergency department or urgent care facility visits</b>                                                                                                                                                                                                                                                                             | 23               | 4                  | 10                 | 9               |         |
| <b>Total number of emergency department or urgent care facility visits due to an event that occurred during exercise</b>                                                                                                                                                                                                                                                 | 2                | 0                  | 2                  | 0               |         |
| <b>Relationship between emergency department or urgent care facility visits and intervention</b>                                                                                                                                                                                                                                                                         |                  |                    |                    |                 |         |
| Unknown                                                                                                                                                                                                                                                                                                                                                                  | 0                | 0 (0.0%)           | 0 (0.0%)           | 0 (0.0%)        |         |
| Not related                                                                                                                                                                                                                                                                                                                                                              | 22               | 5 (100%)           | 8 (80.0%)          | 9 (100%)        | 0.55    |
| Possible                                                                                                                                                                                                                                                                                                                                                                 | 1                | 0 (0.0%)           | 1 (10.0%)          | 0 (0.0%)        |         |
| Probable                                                                                                                                                                                                                                                                                                                                                                 | 0                | 0 (0.0%)           | 0 (0.0%)           | 0 (0.0%)        |         |
| Definite                                                                                                                                                                                                                                                                                                                                                                 | 0                | 0 (0.0%)           | 0 (0.0%)           | 0 (0.0%)        |         |
| eTable 3.n. reflects emergency department visits that occurred between 3 month and 9 month visit, including interim reports during this period. Frequency and percent are shown, where percentages are computed based on the total number of events reported. Only this category had sufficient sample size for statistical analysis. P value is based on Poisson model. |                  |                    |                    |                 |         |

**eTable 3.o. Safety Data Summary: Adverse Event Hospitalizations During 3 Month Intervention**

|                                                                                      | Total<br>(N=209) | Control<br>(N= 69) | Regular and<br>Plus<br>(N=140) | P value |
|--------------------------------------------------------------------------------------|------------------|--------------------|--------------------------------|---------|
| <b>Total number of hospitalization</b>                                               | 1                | 0                  | 1                              |         |
| <b>Total number of participants hospitalization</b>                                  | 1                | 0                  | 1                              |         |
| <b>Total number of hospitalization due to an event that occurred during exercise</b> | 0                | 0                  | 0                              |         |
| <b>Relationship between hospitalization and intervention</b>                         | 0                | 0                  | 0                              |         |
| Unknown                                                                              | 0                | 0 (0.0%)           | 0 (0.0%)                       |         |
| Not related                                                                          | 1                | 0 (0.0%)           | 1 (100%)                       |         |
| Possible                                                                             | 0                | 0 (0.0%)           | 0 (0.0%)                       |         |
| Probable                                                                             | 0                | 0 (0.0%)           | 0 (0.0%)                       |         |
| Definite                                                                             | 0                | 0 (0.0%)           | 0 (0.0%)                       |         |

eTable 3.o. reflects hospitalizations that occurred post-randomization during the 3 month intervention period, including interim reports during this period. Frequency and percent are shown, where percentages are computed based on the total number of events reported.

**eTable 3.p. Safety Data Summary: Adverse Event Hospitalizations During 6 Month Maintenance**

|                                                                                                                                                                                                                         | Total<br>(N=207) | Control<br>(N= 69) | Regular<br>(N= 70) | Plus<br>(N= 68) | P value |
|-------------------------------------------------------------------------------------------------------------------------------------------------------------------------------------------------------------------------|------------------|--------------------|--------------------|-----------------|---------|
| <b>Total number of hospitalization</b>                                                                                                                                                                                  | 5                | 4                  | 1                  | 0               |         |
| <b>Total number of participants hospitalization</b>                                                                                                                                                                     | 4                | 3                  | 1                  | 0               |         |
| <b>Total number of hospitalization due to an event that occurred during exercise</b>                                                                                                                                    | 0                | 0                  | 0                  | 0               |         |
| <b>Relationship between hospitalization and intervention</b>                                                                                                                                                            | 0                | 0                  | 0                  | 0               |         |
| Unknown                                                                                                                                                                                                                 | 0                | 0 (0.0%)           | 0 (0.0%)           | 0 (0.0%)        |         |
| Not related                                                                                                                                                                                                             | 5                | 4 (100%)           | 1 (100%)           | 0 (0.0%)        |         |
| Possible                                                                                                                                                                                                                | 0                | 0 (0.0%)           | 0 (0.0%)           | 0 (0.0%)        |         |
| Probable                                                                                                                                                                                                                | 0                | 0 (0.0%)           | 0 (0.0%)           | 0 (0.0%)        |         |
| Definite                                                                                                                                                                                                                | 0                | 0 (0.0%)           | 0 (0.0%)           | 0 (0.0%)        |         |
| eTable 3.p. reflects hospitalizations that occurred post-randomization between 3 month and 9 month visit. Frequency and percent are shown, where percentages are computed based on the total number of events reported. |                  |                    |                    |                 |         |
