# Supplementary material for: Short- and Long-term Effects of a Mobile Phone App in Conjunction With Brief In-Person Counseling on Physical Activity Among Physically Inactive Women: The mPED Randomized Clinical Trial
Source: PubMed Central journal article supplement (PMC6632135; doi:10.1001/jamanetworkopen.2019.4281), 2019-05-24
Supplement: jamanetwopen-2-e194281-s003.pdf [file jamanetwopen-2-e194281-s003.pdf]

## **Data Sharing Statement**

Fukuoka Y, Haskell W, Lin F, Vittinghoff E. Short- and long-term effects of a mobile phone app in conjunction with brief in-person counseling on physical activity among physically inactive women: the mPED randomized clinical trial. *JAMA Netw Open*. 2019;2(5):e194281. doi:10.1001/jamanetworkopen.2019.4281

### **Data**

**Data available:** *No*
